# Supplementary material
Source: MDPI journal article supplement (https://www.mdpi.com/2072-4292/15/18/4365)
Supplement: s1 [file s1]

**Supplemental Information:** Classifying a highly polymorphic tree species across landscapes using airborne imaging spectroscopy

Seeley, M. M.; Vaughn, N. R.; Shanks, B.; Martin, R. E.; König, M; Asner, G. A.

## Figures

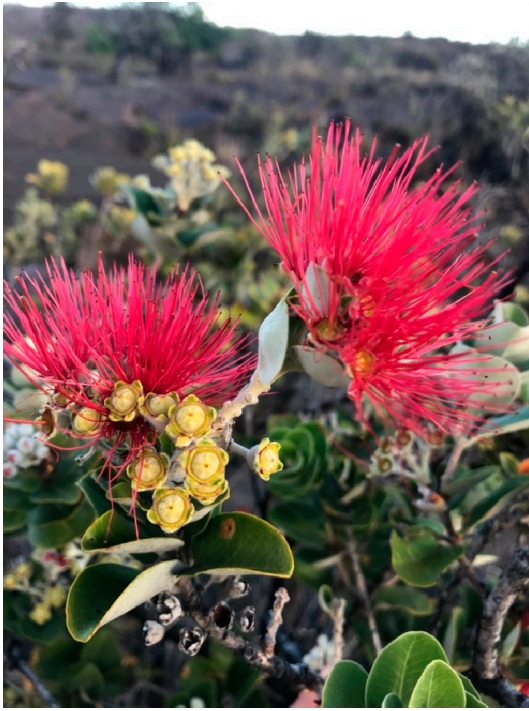

**Figure S1:** *Metrosideros polymorpha* ('ohi'a lehua) in bloom.

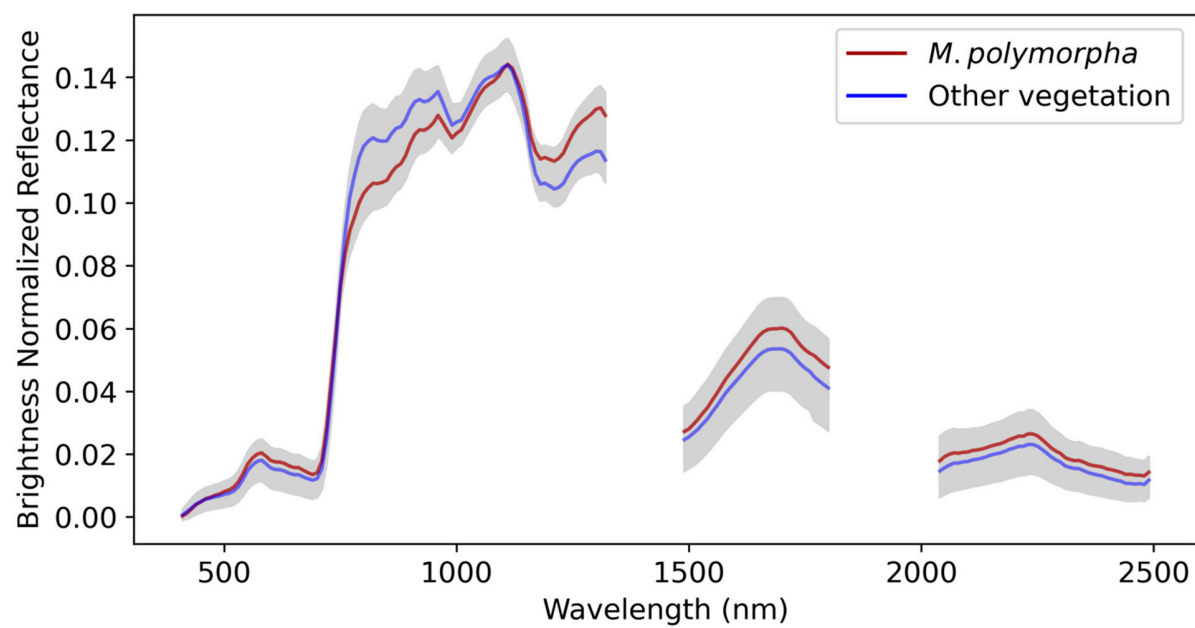

**Figure S2:** Mean spectra of *Metrosideros polymorpha* and other vegetation in spectral library.

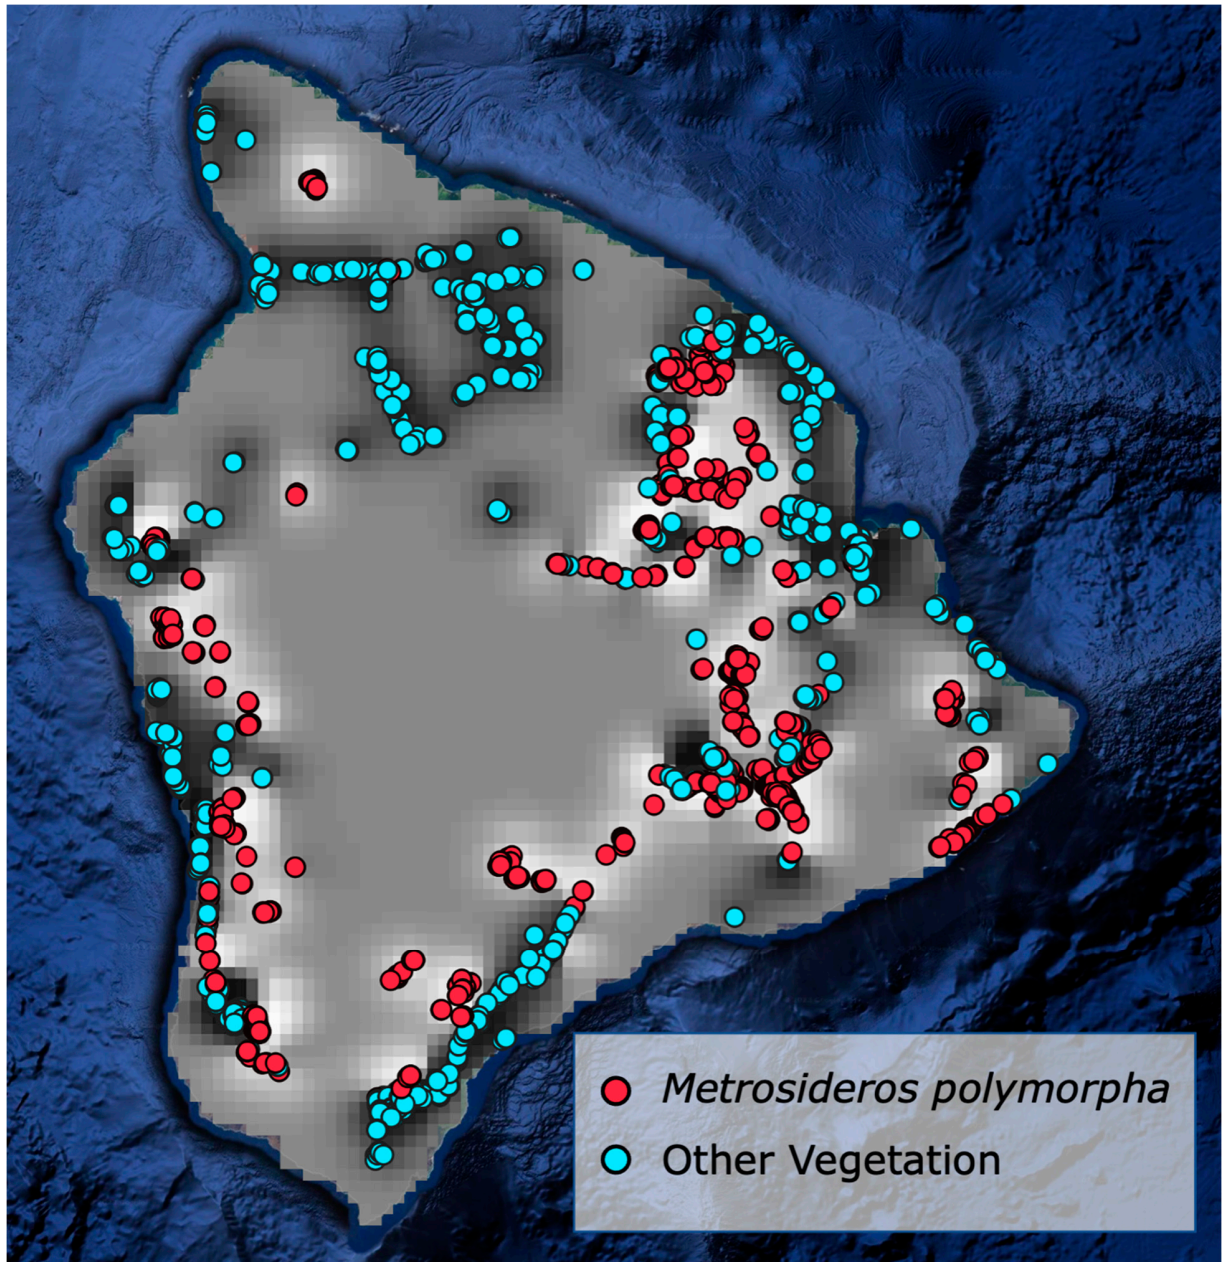

**Figure S3:** Location of the 5366 crowns collected across Hawai'i Island to train the classification models. Red represents all *Metrosideros polymorpha* canopies, and blue are all other vegetation types. Heatmap and contour lines are the gaussian process classification where white represents locations not likely to be *M. polymorpha*, and darker locations represent regions of high *M. polymorpha* likelihood.

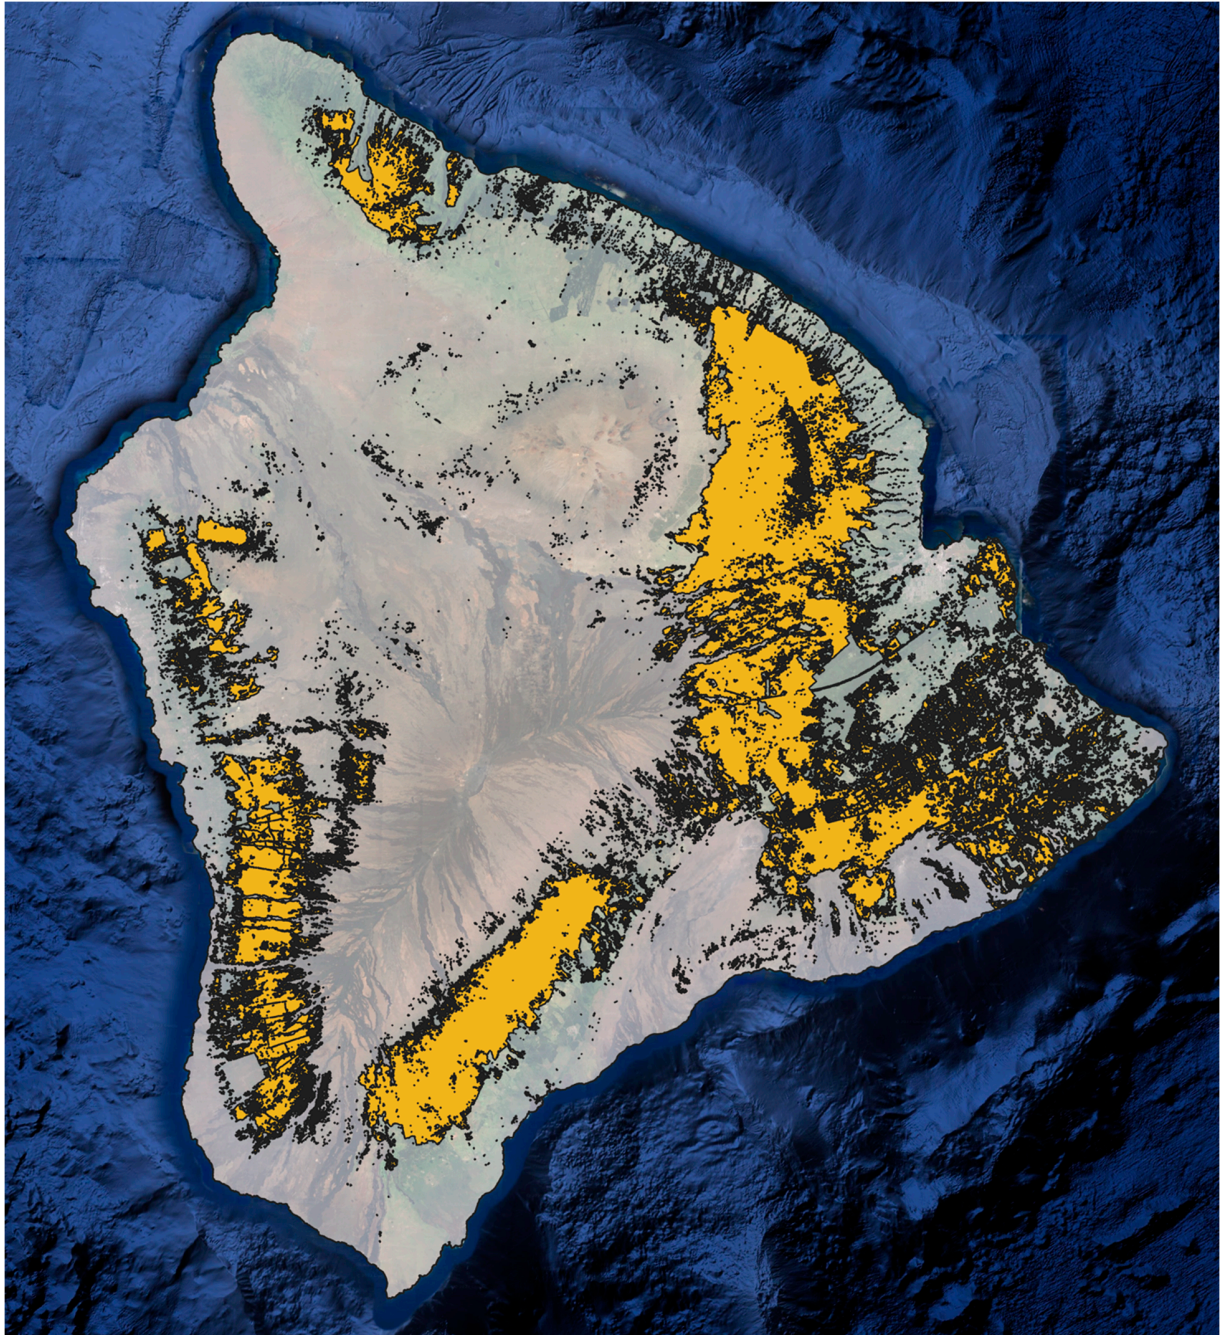

**Figure S4:** 2001 HI-GAP *M. polymorpha* extent as estimated using Landsat data
